# Supplementary material
Source: PubMed Central journal article supplement (PMC4724630)
Supplement: mmc1.pdf [file mmc1.pdf]

**Biophysical Journal**

**Supporting Material**

**Electroporation of Brain Endothelial Cells on Chip toward  
Permeabilizing the Blood-Brain Barrier**

Mohammad Bonakdar,<sup>1,\*</sup> Elisa M. Wasson,<sup>1</sup> Yong W. Lee,<sup>2,3</sup> and Rafael V. Davalos<sup>1,2,3</sup>

<sup>1</sup>Department of Mechanical Engineering and <sup>2</sup>Department of Biomedical Engineering and Mechanics, Virginia Tech, Blacksburg, Virginia; and <sup>3</sup>School of Biomedical Engineering and Sciences, Virginia Tech – Wake Forest University, Virginia Tech, Blacksburg, Virginia

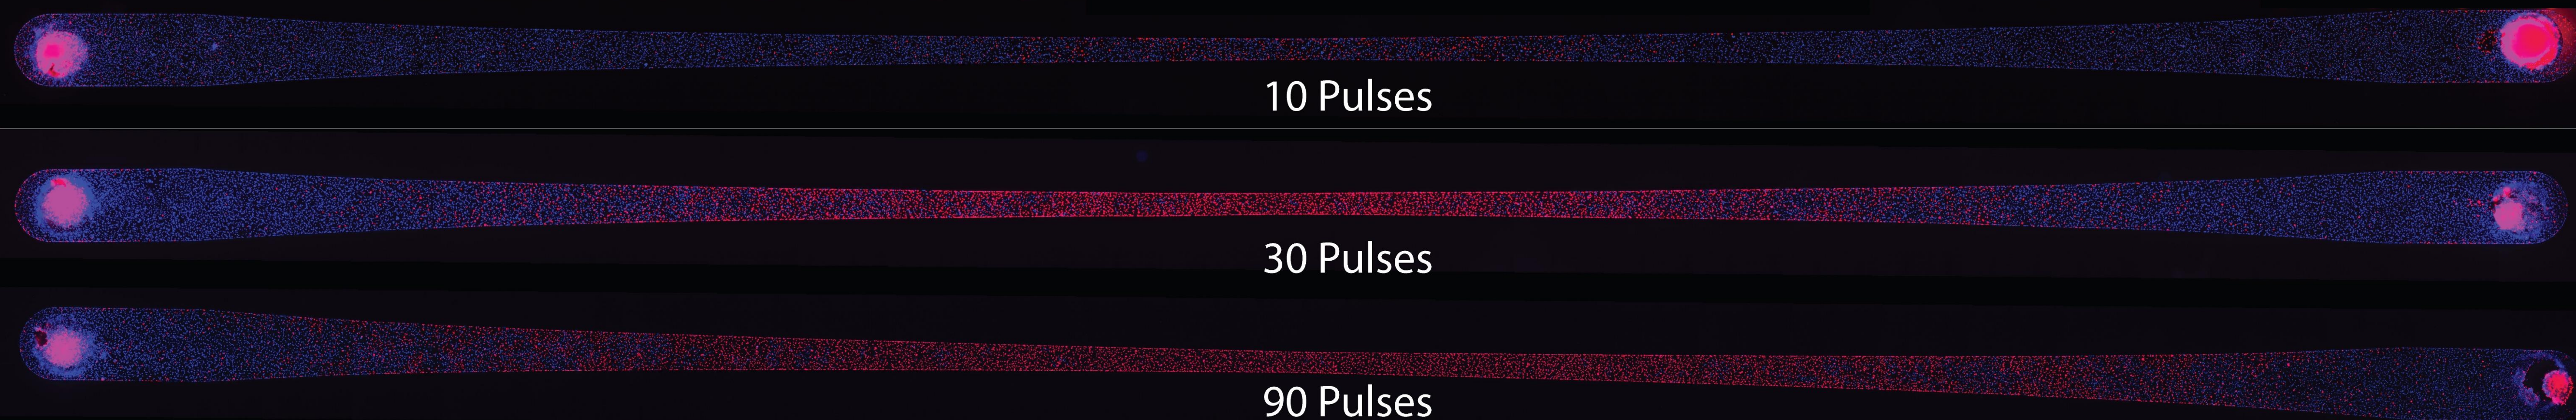

**Figure S1.** High resolution image of irreversibly electroporated cells in the channel for different number of pulses. The blue dots represent the nuclei of live cells and the red dots represent the nuclei of dead cells.

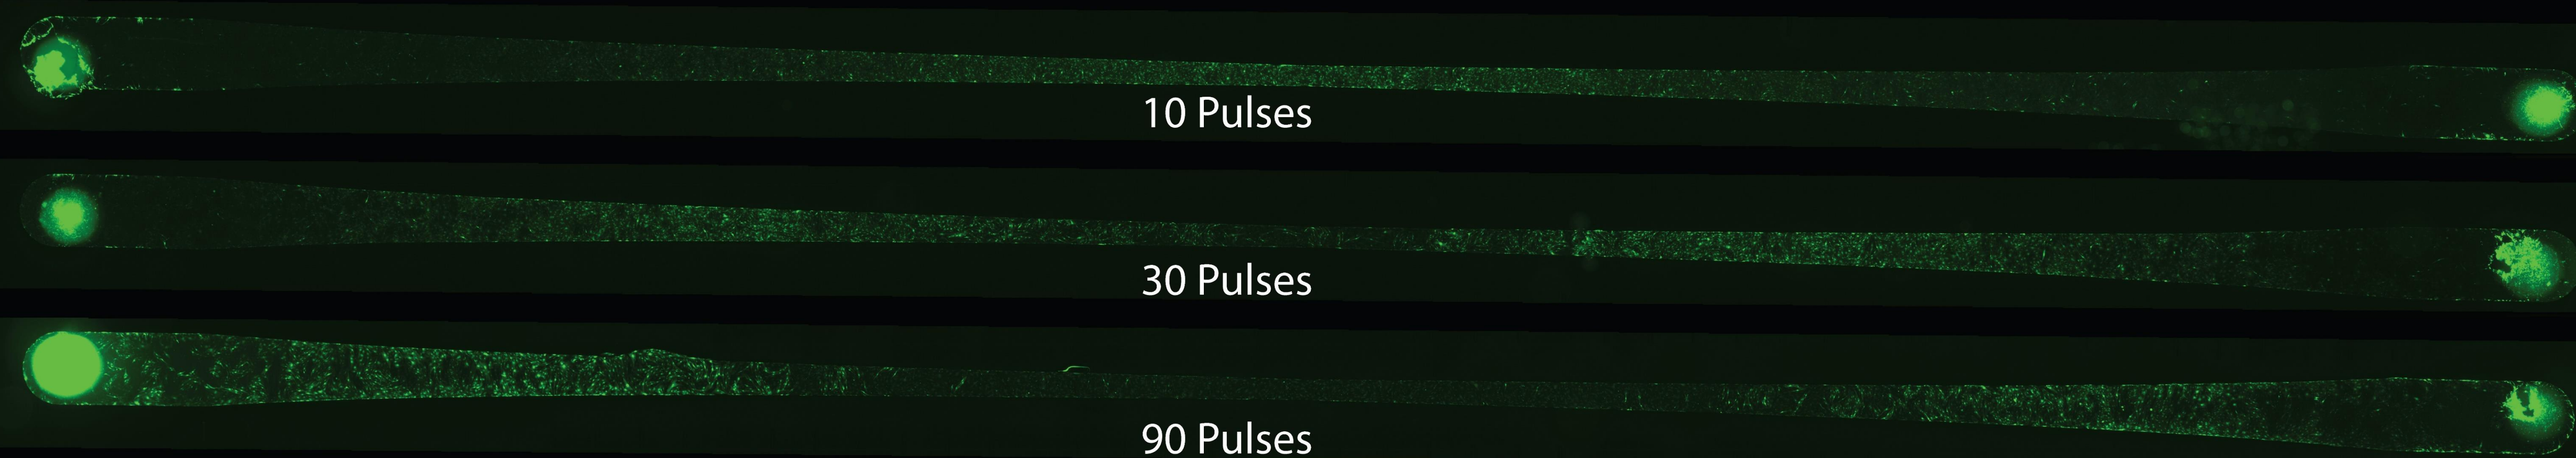

**Figure S2.** High resolution image of electroporated cells in the presence of 4kDa FITC dextran.

**Video S3.** Time-lapse video of electroporation at different sections of the channel after delivery of 10 and 30 pulses. The cells are initially stained with calcein AM (green) and electroporation is visualized by uptake of propidium iodide (red).
